# Supplementary material
Source: PubMed Central journal article supplement (PMC4481674)
Supplement: Appendix_1.pdf [file Appendix_1.pdf]

## Appendix 1. Combined Arthroscopic RC Repair and LHB Procedure Details

| LHB Procedure | Study                         | RC Tear Involvement <sup>^</sup>    | RC Tear Size                                                                                                                                                   | LHB Pathology                                                     | RC Repair Technique*     | Tenodesis Technique        | Concomitant Procedures+          |
|---------------|-------------------------------|-------------------------------------|----------------------------------------------------------------------------------------------------------------------------------------------------------------|-------------------------------------------------------------------|--------------------------|----------------------------|----------------------------------|
| Tenodesis     | Cecchia et al <sup>2</sup>    | SS: 100%<br>IS: 40.0%<br>Sub: 53.3% | All “moderate to severe” full thickness tears                                                                                                                  | Instability: 8<br>Partial tear: 7                                 | Single                   | Intra-articular            | SAD<br>DCR<br>(“when necessary”) |
|               | Franceschi et al <sup>7</sup> | SS: 100%<br>IS: 40.9%<br>Sub: 45.5% | All “massive” full thickness tears                                                                                                                             | Instability: 14<br>Partial tear: 8                                | Double                   | Intra-articular            | SAD (63.6%)                      |
|               | Koh et al <sup>12</sup>       | SS: 100%                            | 3 “partial” thickness tear<br>5 “small”, 19 “medium”, and 16 “large-massive” full thickness tears                                                              | Instability: 4<br>Partial tear: 34<br>Tendinosis: 3<br>SLAP: 19   | Single                   | Intra-articular            | SAD (4.7%)<br>DCR (11.6%)        |
|               | De Carli et al <sup>4</sup>   | NR                                  | “Small to large” full thickness tears                                                                                                                          | Instability: 5<br>Partial tear: 23<br>Tendinosis : 7              | NR                       | Intra-articular            | NR                               |
|               | Nho et al <sup>19</sup>       | SS: 100%<br>Sub: 100%               | SS:<br>1.6±0.9cm (mean)<br>Sub:<br>All full thickness tears ranging from 25% to 100% of tendon                                                                 | Instability: 13                                                   | Double                   | Open, subpectoral approach | SAD (100%)<br>DCR (31.0%)        |
|               | Ji et al <sup>9</sup>         | SS: 100%                            | All “partial” thickness tears (Grade AIII as per Ellman et al <sup>9</sup> )                                                                                   | Instability: 6<br>Partial tear: 33                                | Single                   | Intra-articular            | SAD performed “when indicated”   |
|               | Kim et al <sup>10</sup>       | SS: 100%<br>Sub: 100%               | SS:<br>“Partial” thickness tears (Grade AII and AIII as per Ellman et al <sup>9</sup> )<br>Sub:<br>Full thickness tears involving “upper 1/3 to 2/3 of tendon” | All had either “degeneration of LHB or degenerative SLAP”         | Single                   | Intra-articular            | NR                               |
|               | Lu et al <sup>16</sup>        | NR                                  | All “massive” full thickness tears                                                                                                                             | NR                                                                | NR                       | Intra-articular            | NR                               |
|               | Zhang et al <sup>27</sup>     | NR                                  | “Small”: 36<br>“Medium”: 24<br>“Large”: 14                                                                                                                     | Instability: 14<br>Partial tear: 50<br>Tendinosis: 22<br>SLAP: 17 | Single: 49<br>Double: 25 | Intra-articular            | SAD: 14<br>DCE: 5                |
| Tenotomy      | Franceschi et al <sup>8</sup> | SS: 100%<br>IS: 43.8%               | 8 “small (<1cm),” 15 “medium (1-3cm),” and 9 “large (3-5cm)” full thickness tears                                                                              | SLAP: 32                                                          | Single                   |                            | SAD (28.1%)                      |
|               | Kim et al <sup>11</sup>       | NR                                  | All “large to massive” full thickness tears with >3cm diameter (as                                                                                             | SLAP: 20                                                          | Single                   |                            | NR                               |

|  |                             |                      |                                                                                                                  |                                                                   |                                  |  |                           |
|--|-----------------------------|----------------------|------------------------------------------------------------------------------------------------------------------|-------------------------------------------------------------------|----------------------------------|--|---------------------------|
|  |                             |                      | per Cofield et al <sup>4</sup> )<br>Mean tear size: 38.4mm (range: 30-55 mm)                                     |                                                                   |                                  |  |                           |
|  | Dezaly et al <sup>5</sup>   | SS: 100%<br>IS: 100% | All tears “considered repairable” (Grade 2 or less fatty infiltration as per Goutallier et al <sup>13,14</sup> ) | NR                                                                | Single (35.3%)<br>Double (64.7%) |  | SAD (100%)                |
|  | Koh et al <sup>12</sup>     | SS: 100%             | 3 “partial” thickness tear<br>6 “small”, 16 “medium”, and 16 “large-massive” full thickness tears                | Instability: 0<br>Partial tear: 29<br>Tendinosis : 3<br>SLAP: 21  | Single                           |  | SAD (14.6%)<br>DCR (7.3%) |
|  | De Carli et al <sup>4</sup> | NR                   | “Small to large” full thickness tears                                                                            | Instability: 3<br>Partial tear: 20<br>Tendinosis : 7              | NR                               |  | NR                        |
|  | Zhang et al <sup>27</sup>   | NR                   | “Small”: 35<br>“Medium”: 27<br>“Large”: 15                                                                       | Instability: 17<br>Partial tear: 53<br>Tendinosis: 18<br>SLAP: 19 | Single: 50<br>Double: 27         |  | SAD: 17<br>DCE: 6         |

\*Double, double row; single, single row.

+DCR, distal clavicle resection; SAD, subacromial decompression.

<sup>^</sup>IS, infraspinatus tendon; SS, supraspinatus tendon; Sub, subscapularis tendon.

NR, not reported.
